# Supplementary material for: Characterization of RARRES1 Expression on Circulating Tumor Cells as Unfavorable Prognostic Marker in Resected Pancreatic Ductal Adenocarcinoma Patients
Source: MDPI journal article supplement (doi:10.3390/cancers14184405), 2022-09-10
Supplement: s1 [file s1]

**Supplementary Table S2: Correlation of CTC detection at baseline with clinicopathological parameters in curative and palliative patients**

**A. Curative patients**

|                       |                      | Curative patients n=36 |      |                                   |      |                               |      | p value |
|-----------------------|----------------------|------------------------|------|-----------------------------------|------|-------------------------------|------|---------|
|                       |                      | n                      | %    | No CTC detection at baseline n=27 |      | CTC detection at baseline n=9 |      |         |
|                       |                      |                        |      | n                                 | %    | n                             | %    |         |
| Age                   | ≤ 67 years           | 18                     | 50.0 | 14                                | 51.9 | 4                             | 44.4 | 1.000   |
|                       | > 67 years           | 18                     | 50.0 | 13                                | 48.1 | 5                             | 55.6 |         |
| Gender                | male                 | 17                     | 47.2 | 13                                | 48.1 | 4                             | 44.4 | 1.000   |
|                       | female               | 19                     | 52.8 | 14                                | 51.9 | 5                             | 55.6 |         |
| ECOG                  | 0                    | 20                     | 55.6 | 16                                | 59.3 | 4                             | 44.4 | 0.565   |
|                       | 1                    | 14                     | 38.9 | 9                                 | 33.3 | 5                             | 55.6 |         |
|                       | 2                    | 2                      | 5.6  | 2                                 | 7.4  | 0                             | 0    |         |
| Neoadjuvant treatment | no                   | 29                     | 80.6 | 22                                | 81.5 | 7                             | 77.8 | 1.000   |
|                       | yes                  | 7                      | 19.4 | 5                                 | 18.5 | 2                             | 22.2 |         |
| Surgical procedure    | PD/PPPD              | 20                     | 55.6 | 15                                | 55.6 | 5                             | 55.6 | 1.000   |
|                       | left pancreatectomy  | 13                     | 36.1 | 10                                | 37.0 | 3                             | 33.3 |         |
|                       | total pancreatectomy | 3                      | 8.3  | 2                                 | 7.4  | 1                             | 11.1 |         |
| Adjuvant treatment    | yes                  | 7                      | 19.4 | 6                                 | 22.2 | 1                             | 11.1 | 0.652   |
|                       | no <sup>1</sup>      | 29                     | 80.6 | 21                                | 77.8 | 8                             | 88.9 |         |
| Dindo classification  | 0-2                  | 19                     | 52.8 | 15                                | 55.6 | 4                             | 44.4 | 0.386   |
|                       | 3-4                  | 12                     | 33.3 | 7                                 | 25.9 | 5                             | 55.6 |         |
|                       | 5                    | 5                      | 13.9 | 5                                 | 18.5 | 0                             | 0    |         |
| pT stage              | T1-2                 | 17                     | 47.2 | 13                                | 48.1 | 4                             | 44.4 | 1.000   |
|                       | T3-4                 | 19                     | 52.8 | 14                                | 51.9 | 5                             | 55.6 |         |
| pN stage              | N0                   | 10                     | 27.8 | 9                                 | 33.3 | 1                             | 11.1 | 0.392   |
|                       | N+ (N1/2)            | 26                     | 72.2 | 18                                | 66.7 | 8                             | 88.9 |         |
| Grading <sup>2</sup>  | G2                   | 23                     | 69.7 | 16                                | 66.7 | 7                             | 77.8 | 0.686   |
|                       | G3                   | 10                     | 30.3 | 8                                 | 33.3 | 2                             | 22.2 |         |
| R status              | R0, CRM-             | 18                     | 50.0 | 14                                | 51.9 | 4                             | 44.4 | 1.000   |
|                       | R0, CRM+ / R1        | 18                     | 50.0 | 13                                | 48.1 | 5                             | 55.6 |         |
| UICC                  | I-II                 | 28                     | 77.8 | 22                                | 81.5 | 6                             | 66.7 | 0.384   |
|                       | III                  | 8                      | 22.2 | 5                                 | 18.5 | 3                             | 33.3 |         |
| Ca 19-9               | ≤ 500U/ml            | 26                     | 72.2 | 19                                | 70.4 | 7                             | 77.8 | 1.000   |
|                       | > 500U/ml            | 10                     | 27.8 | 8                                 | 29.6 | 2                             | 22.2 |         |
| Recurrence            | yes                  | 16                     | 44.4 | 14                                | 51.9 | 2                             | 22.2 | 0.245   |
|                       | no                   | 20                     | 55.6 | 13                                | 48.1 | 7                             | 77.8 |         |

<sup>1</sup> Not started during follow-up period, or due to reduced ECOG or death

<sup>2</sup> For n=3 patients no grading (G) is available

## B. Palliative patients

|         |            | Palliative patients n=19 |      |                                   |      |                               |       |         |
|---------|------------|--------------------------|------|-----------------------------------|------|-------------------------------|-------|---------|
|         |            | n                        | %    | No CTC detection at baseline n=14 |      | CTC detection at baseline n=5 |       | p value |
|         |            |                          |      | n                                 | %    | n                             | %     |         |
| Age     | ≤ 67 years | 9                        | 47.4 | 5                                 | 35.7 | 4                             | 80.0  | 0.141   |
|         | > 67 years | 10                       | 52.6 | 9                                 | 64.3 | 1                             | 20.0  |         |
| Gender  | male       | 14                       | 73.7 | 10                                | 71.4 | 4                             | 80.0  | 1.000   |
|         | female     | 5                        | 26.3 | 4                                 | 28.6 | 1                             | 20.0  |         |
| ECOG    | 0          | 5                        | 26.3 | 3                                 | 21.4 | 2                             | 40.0  | 0.787   |
|         | 1          | 11                       | 57.9 | 8                                 | 57.1 | 3                             | 60.0  |         |
|         | 2          | 3                        | 15.8 | 3                                 | 21.4 | 0                             | 0     |         |
| UICC    | III        | 3                        | 15.8 | 3                                 | 21.4 | 0                             | 0     | 0.530   |
|         | IV         | 16                       | 84.2 | 11                                | 78.6 | 5                             | 100.0 |         |
| Ca 19-9 | ≤ 500U/ml  | 7                        | 36.8 | 7                                 | 50.0 | 0                             | 0     | 0.106   |
|         | > 500U/ml  | 12                       | 63.2 | 7                                 | 50.0 | 5                             | 100.0 |         |

ctDNA, circulating tumor DNA; ECOG, Eastern Cooperative Oncology Group; CRM, circumferential resection margin; Ca 19-9, Carbohydrate Antigen 19-9; UICC, Union for International Cancer Control; PD, partial pancreatoduodenectomy; PPPD, pylorus preserving pancreatoduodenectomy
