# Supplementary material for: Characterization of RARRES1 Expression on Circulating Tumor Cells as Unfavorable Prognostic Marker in Resected Pancreatic Ductal Adenocarcinoma Patients
Source: Cancers (Basel). 2022 Sep 10;14(18):4405. doi: 10.3390/cancers14184405 (PMC9497091; doi:10.3390/cancers14184405)
Supplement: Supplementary file 1 [file cancers-14-04405-s001.zip]

Archive with 4 entries (4 files):
- Suppl.Figure S2 .jpg
- Supplementary figure S1.pdf
- Supplementary table S1.xlsx
- Supplementary Table S2.pdf
