# Supplementary material for: Characterization of RARRES1 Expression on Circulating Tumor Cells as Unfavorable Prognostic Marker in Resected Pancreatic Ductal Adenocarcinoma Patients
Source: Cancers (Basel). 2022 Sep 10;14(18):4405. doi: 10.3390/cancers14184405 (PMC9497091; doi:10.3390/cancers14184405)
Supplement: Supplementary file 1 [file cancers-14-04405-s001.zip › Supplementary table S1.xlsx]

## Sheet: Tabelle1
Supplementary Table S1
SILAC-based peptide identification in L3.6pl-Res and L3.6pl-WT cells
TIG1_Human
Retinoic acid receptor responder protein 1 OS=Homo sapiens GN=RARRES1 PE=2 SV=2
Database:	SwissProt
Score:	139
Monoisotopic mass (Mr):	33264
Calculated pI:	8.74
Taxonomy:	HOMO SAPIENS
Query	Observed	Mr(expt)	Mr(calc)	ppm	Miss	Score	Expect	Rank	Unique	Peptid
9	390.7182	779.4218	779.4233	-1.84	0	14	3.6	1	U	R.SGSPSALR.V + Label:13C(6) (R)
58	503.7809	1005.5472	1005.5550	-7.73	0	(14)	4.4	1	U	R.VLAEVQEGR.A + Label:13C(6) (R)
59	503.7822	1005.5498	1005.5550	-5.15	0	(24)	0.41	1	U	R.VLAEVQEGR.A + Label:13C(6) (R)
60	503.7824	1005.5502	1005.5550	-4.75	0	54	0.00043	1	U	R.VLAEVQEGR.A + Label:13C(6) (R)
78	540.2992	1078.5838	1078.5867	-2.63	0	30	0.1	1	U	K.VHVVFSTER.Y + Label:13C(6) (R)
90	564.8051	1127.5956	1127.5972	-1.35	0	8	16	1	U	R.AALHFFNFR.S + Label:13C(6) (R)
110	603.3084	1204.6022	1204.6071	-4.03	0	38	0.019	1	U	R.QQEDYLLYK.Q + Label:13C(6) (K)
159	749.3662	1496.7178	1496.7202	-1.59	0	(40)	0.0099	1	U	R.YNPESLLQEGEGR.L + Label:13C(6) (R)
160	749.3669	1496.7192	1496.7202	-0.66	0	58	0.00016	1	U	R.YNPESLLQEGEGR.L + Label:13C(6) (R)
161	749.3685	1496.7224	1496.7202	1.48	0	(38)	0.015	1	U	R.YNPESLLQEGEGR.L + Label:13C(6) (R)
NGAL_HUMAN
Neutrophil gelatinase-associated lipocalin OS=Homo sapiens GN=LCN2 PE=1 SV=2
Database:	SwissProt
Score:	270
Monoisotopic mass (Mr):	22574
Calculated pI:	9.02
Taxonomy:	HOMO SAPIENS
Query	Observed	Mr(expt)	Mr(calc)	ppm	Miss	Score	Expect	Rank	Unique	Peptid
83	591.8174	1181.6202	1181.6232	-2.46	1	15	3.2	1	U	K.VSQNREYFK.I + Label:13C(6) (K); Label:13C(6) (R)
94	631.3419	1260.6692	1260.6810	-9.29	0	(30)	0.1	1	U	K.SYPGLTSYLVR.V + Label:13C(6) (R)
95	631.3430	1260.6714	1260.6810	-7.54	0	(24)	0.47	1	U	K.SYPGLTSYLVR.V + Label:13C(6) (R)
96	631.3473	1260.6800	1260.6810	-0.72	0	38	0.016	1	U	K.SYPGLTSYLVR.V + Label:13C(6) (R)
118	497.6093	1489.8061	1489.8179	-7.92	1	(28)	0.14	1	U	K.ELTSELKENFIR.F + Label:13C(6) (K); Label:13C(6) (R)
119	745.9175	1489.8204	1489.8179	1.73	1	69	1.3e-05	1	U	K.ELTSELKENFIR.F + Label:13C(6) (K); Label:13C(6) (R)
142	597.6348	1789.8826	1789.8917	-5.10	0	7	27	1	U	R.VVSTNYNQHAMVFFK.K + Label:13C(6) (K)
148	599.6333	1795.8781	1795.8949	-9.36	0	(14)	4.8	1	U	K.VPLQQNFQDNQFQGK.W + Label:13C(6) (K)
149	599.6370	1795.8892	1795.8949	-3.18	0	(32)	0.08	1	U	K.VPLQQNFQDNQFQGK.W + Label:13C(6) (K)
150	898.9542	1795.8938	1795.8949	-0.58	0	(35)	0.04	1	U	K.VPLQQNFQDNQFQGK.W + Label:13C(6) (K)
151	599.6398	1795.8976	1795.8949	1.50	0	35	0.035	1	U	K.VPLQQNFQDNQFQGK.W + Label:13C(6) (K)
152	898.9568	1795.8990	1795.8949	2.32	0	(33)	0.06	1	U	K.VPLQQNFQDNQFQGK.W + Label:13C(6) (K)
157	624.3158	1869.9256	1869.9391	-7.22	0	(32)	0.066	1	U	R.TFVPGCQPGEFTLGNIK.S + Carbamidomethyl (C); Label:13C(6) (K)
158	935.9810	1869.9474	1869.9391	4.48	0	73	5.7e-06	1	U	R.TFVPGCQPGEFTLGNIK.S + Carbamidomethyl (C); Label:13C(6) (K)
175	774.0558	2319.1456	2319.1569	-4.90	0	(29)	0.13	1	U	K.SLGLPENHIVFPVPIDQCIDG.- + Carbamidomethyl (C)
176	1160.5919	2319.1692	2319.1569	5.31	0	32	0.059	1	U	K.SLGLPENHIVFPVPIDQCIDG.- + Carbamidomethyl (C)
K2C1_HUMAN
Keratin, type II cytoskeletal 1 OS=Homo sapiens GN=KRT1 PE=1 SV=6
Database:	SwissProt
Score:	52
Monoisotopic mass (Mr):	65999
Calculated pI:	8.15
Taxonomy:	HOMO SAPIENS
Query	Observed	Mr(expt)	Mr(calc)	ppm	Miss	Score	Expect	Rank	Unique	Peptid
21	416.7492	831.4838	831.4814	2.94	0	12	5.7	1	U	K.SISISVAR.G
36	437.7548	873.4950	873.4920	3.52	0	25	0.32	1	U	R.SLVNLGGSK.S
53	487.2703	972.5260	972.5240	2.13	0	21	0.9	1	U	K.IEISELNR.V
76	533.2592	1064.5038	1064.5138	-9.36	0	0	78	2	U	K.AQYEDIAQK.S
104	590.3017	1178.5888	1178.5931	-3.63	0	32	0.061	1	U	K.YEELQITAGR.H
126	633.3224	1264.6302	1264.6299	0.26	0	13	5.7	2	U	R.TNAENEFVTIK.K
137	651.8629	1301.7112	1301.7078	2.63	0	12	6	1	U	R.SLDLDSIIAEVK.A
147	697.3711	1392.7276	1392.7249	2.00	1	36	0.032	1	U	R.TNAENEFVTIKK.D
156	738.3998	1474.7850	1474.7780	4.79	0	26	0.3	1	U	R.FLEQQNQVLQTK.W
CO3_HUMAN
Complement C3 OS=Homo sapiens GN=C3 PE=1 SV=2
Database:	SwissProt
Score:	592
Monoisotopic mass (Mr):	187030
Calculated pI:	6.02
Taxonomy:	HOMO SAPIENS
Query	Observed	Mr(expt)	Mr(calc)	ppm	Miss	Score	Expect	Rank	Unique	Peptid
17	406.2506	810.4866	810.4947	-9.88	0	21	0.42	1	U	R.TFISPIK.C + Label:13C(6) (K)
30	424.7789	847.5432	847.5474	-4.95	0	3	21	3	U	R.VVLVAVDK.G + Label:13C(6) (K)
42	446.7722	891.5298	891.5372	-8.28	0	10	9	3	U	R.ISLPESLK.R + Label:13C(6) (K)
43	447.2410	892.4674	892.4709	-3.92	0	19	1.2	1	U	R.NEQVEIR.A + Label:13C(6) (R)
44	447.7550	893.4954	893.4954	0.06	0	7	23	1	U	K.IWDVVEK.A + Label:13C(6) (K)
47	452.7499	903.4852	903.4910	-6.31	0	24	0.47	1	U	R.AVLYNYR.Q + Label:13C(6) (R)
50	483.2876	964.5606	964.5649	-4.37	0	14	3.8	1	U	K.GLEVTITAR.F + Label:13C(6) (R)
52	486.2921	970.5696	970.5737	-4.19	1	3	45	2	U	R.EALKLEEK.K + 2 Label:13C(6) (K)
61	504.7846	1007.5546	1007.5594	-4.76	0	19	1.3	1	U	K.TGLQEVEVK.A + Label:13C(6) (K)
73	527.8341	1053.6536	1053.6585	-4.57	1	15	1.3	1	U	R.ISLPESLKR.I + Label:13C(6) (K); Label:13C(6) (R)
81	545.2938	1088.5730	1088.5710	1.87	0	44	0.0046	1	U	K.GYTQQLAFR.Q + Label:13C(6) (R)
87	558.8265	1115.6384	1115.6394	-0.88	0	42	0.0059	1	U	K.VLLDGVQNPR.A + Label:13C(6) (R)
94	573.2818	1144.5490	1144.5536	-3.98	0	19	1	1	U	K.FYYIYNEK.G + Label:13C(6) (K)
96	577.8134	1153.6122	1153.6551	-37.14	0	9	14	1	U	R.HQQTVTIPPK.S + Label:13C(6) (K)
98	579.8148	1157.6150	1157.6176	-2.23	0	36	0.033	1	U	R.QPSSAFAAFVK.R + Label:13C(6) (K)
101	582.8261	1163.6376	1163.6411	-2.98	1	15	3.4	1	U	R.FISLGEACKK.V + Carbamidomethyl (C); 2 Label:13C(6) (K)
102	390.8821	1169.6245	1169.6371	-10.76	1	7	24	1	U	R.YISKYELDK.A + 2 Label:13C(6) (K)
112	607.8216	1213.6286	1213.6148	11.4	0	(11)	9	1	U	R.YYTYLIMNK.G + Label:13C(6) (K)
113	408.9037	1223.6893	1223.7164	-22.16	0	(14)	3.4	1	U	K.VTIKPAPETEK.R + 2 Label:13C(6) (K)
114	612.8674	1223.7202	1223.7164	3.16	0	23	0.36	1	U	K.VTIKPAPETEK.R + 2 Label:13C(6) (K)
115	615.8115	1229.6084	1229.6097	-1.05	0	25	0.33	1	U	R.YYTYLIMNK.G + Oxidation (M); Label:13C(6) (K)
119	623.8203	1245.6260	1245.6231	2.36	0	27	0.23	1	U	R.AELQCPQPAAR.R + Carbamidomethyl (C); Label:13C(6) (R)
120	625.8820	1249.7494	1249.7545	-4.06	1	16	1.3	1	U	R.KVLLDGVQNPR.A + Label:13C(6) (K); Label:13C(6) (R)
124	628.8289	1255.6432	1255.6360	5.78	0	54	0.00041	1	U	K.NTMILEICTR.Y + Carbamidomethyl (C); Label:13C(6) (R)
127	634.3098	1266.6050	1266.6147	-7.62	0	19	1.1	1	U	K.QELSEAEQATR.T + Label:13C(6) (R)
130	636.8226	1271.6306	1271.6309	-0.20	0	(41)	0.0086	1	U	K.NTMILEICTR.Y + Carbamidomethyl (C); Oxidation (M); Label:13C(6) (R)
135	648.3147	1294.6148	1294.6209	-4.67	0	69	1.1e-05	1	U	K.SGSDEVQVGQQR.T + Label:13C(6) (R)
138	652.7907	1303.5668	1303.5632	2.79	0	18	0.86	1	U	R.CAEENCFIQK.S + 2 Carbamidomethyl (C); Label:13C(6) (K)
139	653.8076	1305.6006	1305.6007	-0.01	0	20	0.62	1	U	K.ACEPGVDYVYK.T + Carbamidomethyl (C); Label:13C(6) (K)
144	688.8759	1375.7372	1375.7443	-5.12	0	31	0.087	1	U	K.TIYTPGSTVLYR.I + Label:13C(6) (R)
148	467.9117	1400.7133	1400.7298	-11.79	1	26	0.31	1	U	K.KQELSEAEQATR.T + Label:13C(6) (K); Label:13C(6) (R)
149	701.3696	1400.7246	1400.7298	-3.67	1	(5)	36	3	U	K.KQELSEAEQATR.T + Label:13C(6) (K); Label:13C(6) (R)
151	704.4309	1406.8472	1406.8480	-0.55	0	22	0.21	1	U	K.SSLSVPYVIVPLK.T + Label:13C(6) (K)
157	738.9006	1475.7866	1475.7927	-4.10	0	55	0.00038	1	U	R.IPIEDGSGEVVLSR.K + Label:13C(6) (R)
162	506.6137	1516.8193	1516.8345	-10.03	0	(10)	9.4	1	U	R.LVAYYTLIGASGQR.E + Label:13C(6) (R)
163	759.4240	1516.8334	1516.8345	-0.69	0	64	3.3e-05	1	U	R.LVAYYTLIGASGQR.E + Label:13C(6) (R)
166	824.4007	1646.7868	1646.7818	3.08	0	(14)	4.1	1	U	K.AGDFLEANYMNLQR.S + Label:13C(6) (R)
168	832.3975	1662.7804	1662.7767	2.25	0	44	0.0041	1	U	K.AGDFLEANYMNLQR.S + Oxidation (M); Label:13C(6) (R)
170	837.3831	1672.7516	1672.7498	1.09	0	41	0.0047	1	U	K.VYAYYNLEESCTR.F + Carbamidomethyl (C); Label:13C(6) (R)
171	847.4445	1692.8744	1692.8600	8.51	0	75	3.6e-06	1	U	R.SYTVAIAGYALAQMGR.L + Oxidation (M); Label:13C(6) (R)
175	598.6613	1792.9621	1792.9819	-11.06	0	41	0.0076	1	U	R.SGIPIVTSPYQIHFTK.T + Label:13C(6) (K)
177	911.9635	1821.9124	1821.9051	4.02	0	96	2.5e-08	1	U	R.SNLDEDIIAEENIVSR.S + Label:13C(6) (R)
181	623.2970	1866.8692	1866.8885	-10.38	1	21	0.63	1	U	R.SEETKENEGFTVTAEGK.G + 2 Label:13C(6) (K)
185	666.6699	1996.9879	1997.0039	-8.02	1	18	1.7	1	U	K.SGQSEDRQPVPGQQMTLK.I + Label:13C(6) (K); Label:13C(6) (R)
188	672.0010	2012.9812	2012.9988	-8.76	1	(10)	9.8	1	U	K.SGQSEDRQPVPGQQMTLK.I + Oxidation (M); Label:13C(6) (K); Label:13C(6) (R)
189	727.0330	2178.0772	2178.0934	-7.44	0	70	9.2e-06	1	U	R.ILLQGTPVAQMTEDAVDAER.L + Oxidation (M); Label:13C(6) (R)
190	1090.0580	2178.1014	2178.0934	3.71	0	(16)	2.4	1	U	R.ILLQGTPVAQMTEDAVDAER.L + Oxidation (M); Label:13C(6) (R)
191	735.3803	2203.1191	2203.1428	-10.77	0	70	9.3e-06	1	U	R.VPVAVQGEDTVQSLTQGDGVAK.L + Label:13C(6) (K)
192	1102.5809	2203.1472	2203.1428	2.02	0	(36)	0.022	1	U	R.VPVAVQGEDTVQSLTQGDGVAK.L + Label:13C(6) (K)
196	809.4346	2425.2820	2425.2925	-4.35	1	12	4.8	1	U	R.ILLQGTPVAQMTEDAVDAERLK.H + Oxidation (M); Label:13C(6) (K); Label:13C(6) (R)
199	923.1134	2766.3184	2766.3234	-1.83	1	41	0.0069	1	U	R.EGVQKEDIPPADLSDQVPDTESETR.I + Label:13C(6) (K); Label:13C(6) (R)
G3P_HUMAN
Glyceraldehyde-3-phosphate dehydrogenase OS=Homo sapiens GN=GAPDH PE=1 SV=3
Database:	SwissProt
Score:	31
Monoisotopic mass (Mr):	36030
Calculated pI:	8.57
Taxonomy:	HOMO SAPIENS
Query	Observed	Mr(expt)	Mr(calc)	ppm	Miss	Score	Expect	Rank	Unique	Peptid
152	709.4107	1416.8068	1416.8032	2.59	0	31	0.06	1	U	R.GALQNIIPASTGAAK.A + Label:13C(6) (K)
178	920.4711	1838.9276	1838.9326	-2.67	0	4	52	2	U	K.IISNASCTTNCLAPLAK.V + 2 Carbamidomethyl (C); Label:13C(6) (K)
KPYM_HUMAN
Pyruvate kinase isozymes M1/M2 OS=Homo sapiens GN=PKM PE=1 SV=4
Database:	SwissProt
Score:	52
Monoisotopic mass (Mr):	57900
Calculated pI:	7.96
Taxonomy:	HOMO SAPIENS
Query	Observed	Mr(expt)	Mr(calc)	ppm	Miss	Score	Expect	Rank	Unique	Peptid
95	574.3178	1146.6210	1146.6228	-1.49	0	5	36	2	U	R.GDLGIEIPAEK.V + Label:13C(6) (K)
142	683.3665	1364.7184	1364.7178	0.51	0	52	0.00071	1	U	R.NTGIICTIGPASR.S + Carbamidomethyl (C); Label:13C(6) (R)
K1C10_HUMAN
Keratin, type I cytoskeletal 10 OS=Homo sapiens GN=KRT10 PE=1 SV=6
Database:	SwissProt
Score:	85
Monoisotopic mass (Mr):	58792
Calculated pI:	5.13
Taxonomy:	HOMO SAPIENS
Query	Observed	Mr(expt)	Mr(calc)	ppm	Miss	Score	Expect	Rank	Unique	Peptid
13	404.2029	806.3912	806.3923	-1.25	0	10	8.2	1	U	R.LAADDFR.L
66	516.2996	1030.5846	1030.5910	-6.18	0	18	1.3	1	U	R.VLDELTLTK.A
82	545.7662	1089.5178	1089.5237	-5.35	0	18	1.4	1	U	K.VTMQNLNDR.L
125	631.7975	1261.5804	1261.5899	-7.46	0	58	0.00014	1	U	R.SLLEGEGSSGGGGR.G
145	691.3300	1380.6454	1380.6408	3.34	0	50	0.00091	1	U	R.ALEESNYELEGK.I
158	498.5765	1492.7077	1492.7270	-12.93	1	18	1.6	1	U	R.SQYEQLAEQNRK.D
158	498.5765	1492.7077	1492.7270	-12.93	1	18	1.6	1	U	R.SQYEQLAEQNRK.D
LAMA5_HUMAN
Laminin subunit alpha-5 OS=Homo sapiens GN=LAMA5 PE=1 SV=8
Database:	SwissProt
Score:	54
Monoisotopic mass (Mr):	399479
Calculated pI:	6.66
Taxonomy:	HOMO SAPIENS
Query	Observed	Mr(expt)	Mr(calc)	ppm	Miss	Score	Expect	Rank	Unique	Peptid
111	605.3095	1208.6044	1208.6092	-3.96	0	54	0.00048	1	U	K.AVAAEAQDTATR.V + Label:13C(6) (R)
SODM_HUMAN
Superoxide dismutase [Mn], mitochondrial OS=Homo sapiens GN=SOD2 PE=1 SV=2
Database:	SwissProt
Score:	65
Monoisotopic mass (Mr):	24707
Calculated pI:	8.35
Taxonomy:	HOMO SAPIENS
Query	Observed	Mr(expt)	Mr(calc)	ppm	Miss	Score	Expect	Rank	Unique	Peptid
54	508.7822	1015.5498	1015.5853	-34.92	0	14	4.5	1	U	K.NVRPDYLK.A + Label:13C(6) (K); Label:13C(6) (R)
112	715.9214	1429.8282	1429.8236	3.26	0	65	2e-05	1	U	K.GDVTAQIALQPALK.F + Label:13C(6) (K)
STC1_HUMAN
Stanniocalcin-1 OS=Homo sapiens GN=STC1 PE=1 SV=1
Database:	SwissProt
Score:	39
Monoisotopic mass (Mr):	27604
Calculated pI:	8.28
Taxonomy:	HOMO SAPIENS
Query	Observed	Mr(expt)	Mr(calc)	ppm	Miss	Score	Expect	Rank	Unique	Peptid
75	572.3043	1142.5940	1142.6044	-9.03	0	31	0.1	1	U	R.VAAQNSAEVVR.C
76	575.3178	1148.6210	1148.6245	-3.00	0	(28)	0.17	1	U	R.VAAQNSAEVVR.C + Label:13C(6) (R)
