# Supplementary figures and images for: Characterization of RARRES1 Expression on Circulating Tumor Cells as Unfavorable Prognostic Marker in Resected Pancreatic Ductal Adenocarcinoma Patients
Source: MDPI journal article supplement (doi:10.3390/cancers14184405), 2022-09-10

### Supplementary Figure S1: Study cohort

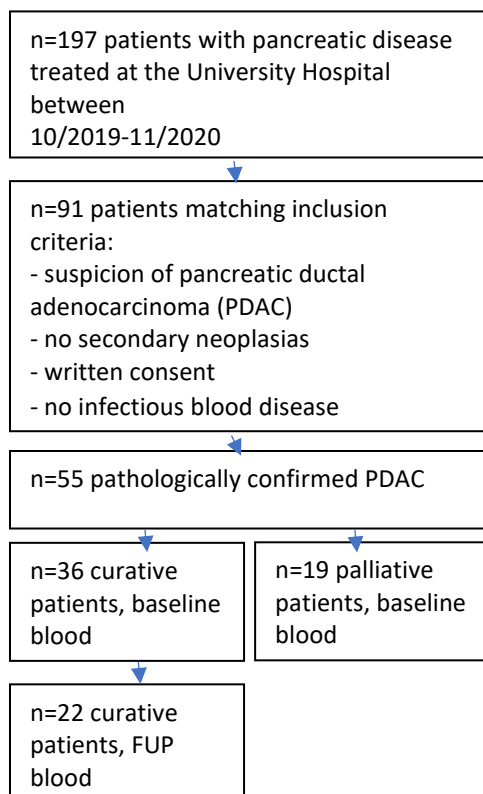

**Figure S1.** Study cohort recruitment flowchart.

Supplement: s1 [file s1]
